# Supplementary material
Source: PubMed Central journal article supplement (PMC3933017)
Supplement: NIHMS550935-supplement-1.pdf [file NIHMS550935-supplement-1.pdf]

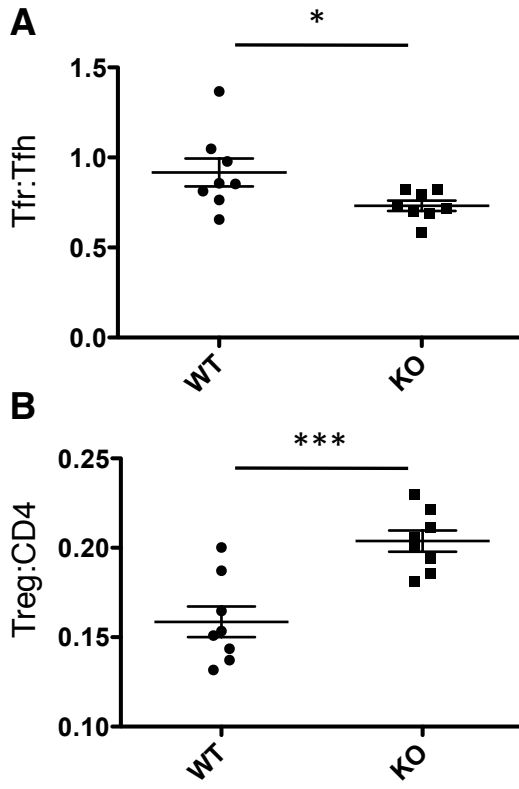

**Supplementary figure 1:** WT and KO mice were immunized with NP-KLH in CFA s.c. 7 days later spleens were isolated and stained. The Tfr:Tfh ratio (a) and the Treg:CD4 ratio (b) is shown. \* $p < 0.05$ ; \*\*\* $p < 0.001$  (graphs show mean + S.E.M.)

**A**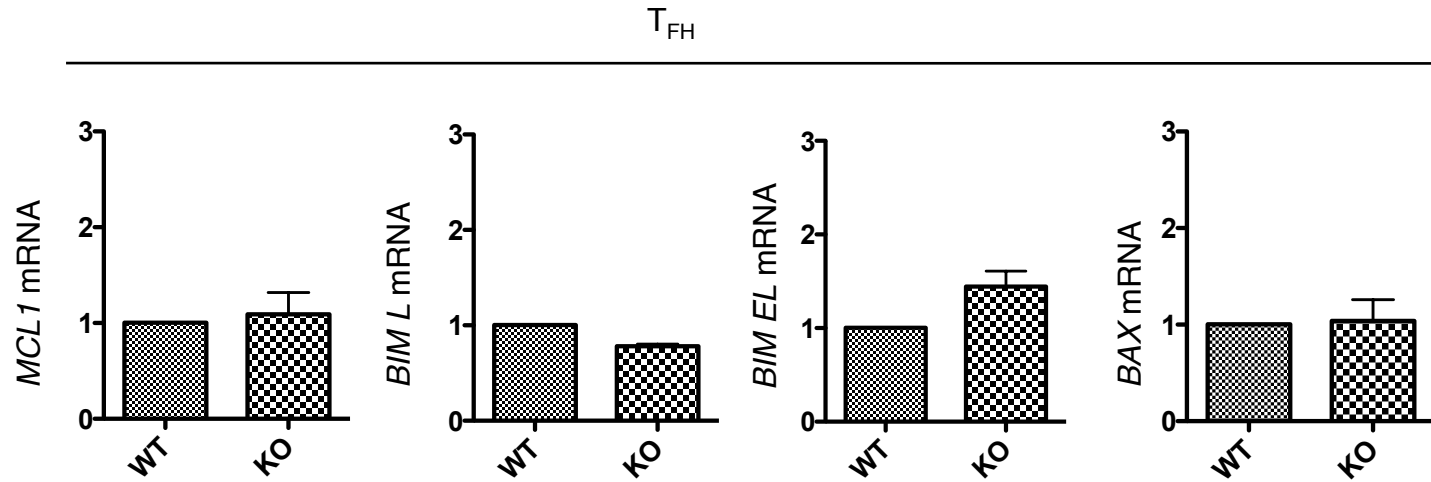**B**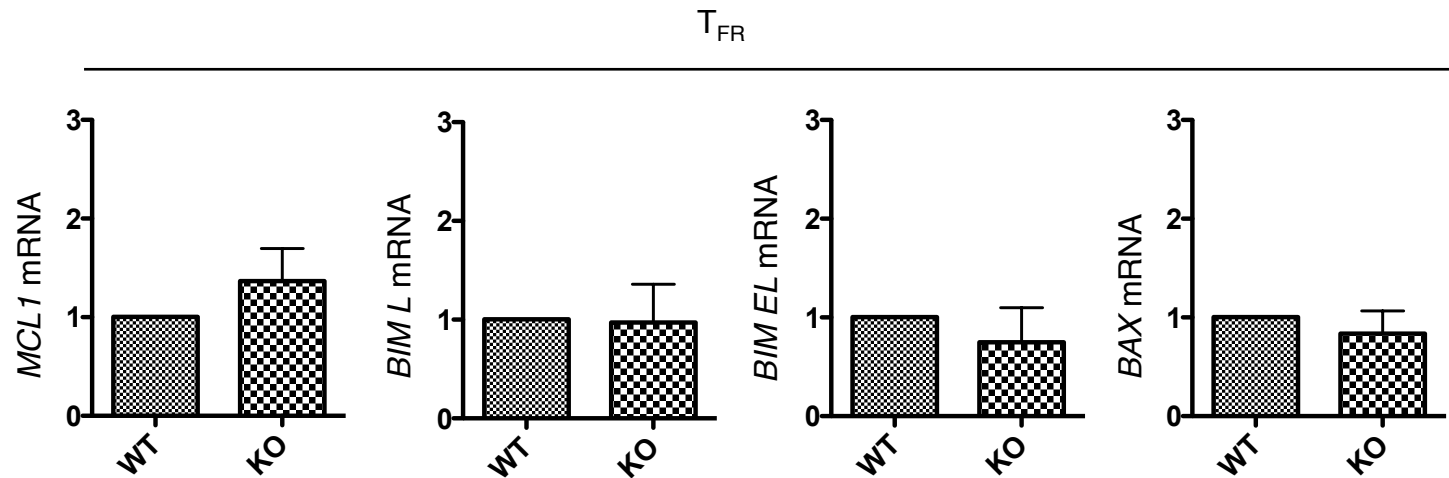

**Supplementary Figure 2: mRNA levels of apoptosis related genes in  $T_{FH}$  and  $T_{FR}$  cells.** Equal numbers of  $T_{FH}$  (A) (CD4+ CXCR5+ PD-1+ FoxP3-) and  $T_{FR}$  (B) (CD4+ CXCR5+ PD-1+ FoxP3+) cells were sorted from the dLN of PTPN22 WT and KO FoxP3 GFP+ mice following 7 day immunization with NP-KLH in CFA. Q-PCR was performed to analyze the amount of MCL-1, Bim L splice variant, Bim EL splice variant and Bax mRNA. Data shown is normalized to WT. All data shown is from 3 independent sorts combined with a total of 4 LN per sort, per genotype.
